# Supplementary material
Source: HighWire-hosted journal article supplement (https://sit.bmj.com/highwire/filestream/186/field_highwire_adjunct_files/0/bmjsit-2020-000056supp001_data_supplement.pdf)
Supplement: bmjsit-2020-000056supp001_data_supplement.pdf [file bmjsit-2020-000056supp001_data_supplement.pdf]

**Supplementary Table 1.** Recurrence data for men with GG1 disease on post-PGC follow up biopsy.

| Recurrence, n (%) |           |
|-------------------|-----------|
| In-field          | 4 (11.43) |
| Out-of-field      | 3 (8.57)  |
| Ablated site      | 5 (14.29) |
| Non-ablated site  | 2 (5.71)  |

GG: Grade Group; PGC: partial gland cryoablation
